# Supplementary material for: Exploration of a new building block for the construction of cyano-bridged solvatomagnetic assemblies: [Ni(cyclam)]3+
Source: Royal Society of Chemistry journal article supplement (doi:10.1039/c6ce01524g), 2016-01-01
Supplement: c6ce01524g1.pdf [file c6ce01524g1.pdf]

Supporting information for  
Exploration of a new building block for the construction of  
cyano-bridged solvatomagnetic assemblies:  $[\text{Ni}(\text{cyclam})]^{3+}$

Beata Nowicka,<sup>\*a</sup> Michał Heczko,<sup>a</sup> Mateusz Reczyński,<sup>a</sup> Michał Rams,<sup>b</sup>  
Bartłomiej Gaweł,<sup>c</sup> Wojciech Nitek<sup>a</sup> and Barbara Sieklucka<sup>a</sup>

<sup>a</sup> Faculty of Chemistry, Jagiellonian University, Ingardena 3, 30-060 Kraków, Poland

<sup>b</sup> Institute of Physics, Jagiellonian University, Łojasiewicza 11, 30-348 Kraków, Poland

<sup>c</sup> Ugelstad Laboratory, Department of Chemical Engineering, Norwegian University of Science and Technology (NTNU) N-7491 Trondheim, Norway

|     |                                                                                                                                                         |    |
|-----|---------------------------------------------------------------------------------------------------------------------------------------------------------|----|
| 1.  | <b>Table S1.</b> Crystallographic data for <b>1</b> and <b>2</b>                                                                                        | S2 |
| 2.  | <b>Table S2.</b> Crystallographic data for <b>1d</b> and <b>2d</b>                                                                                      | S3 |
| 3.  | <b>Figure S1.</b> The Rietveld plot for <b>1d</b> .                                                                                                     | S3 |
| 4.  | <b>Figure S2.</b> Structure of <b>1d</b> with atom numbering.                                                                                           | S4 |
| 5.  | <b>Figure S3.</b> Thermogravimetric analysis of <b>1</b> and <b>2</b> .                                                                                 | S4 |
| 6.  | <b>Figure S4.</b> PXRD patterns for <b>1</b> , <b>1d</b> and <b>1dh</b> .                                                                               | S5 |
| 7.  | <b>Figure S5.</b> Structure of <b>2</b> with atom numbering.                                                                                            | S5 |
| 8.  | <b>Figure S6.</b> Hydrogen bonds in the structure of <b>1</b> .                                                                                         | S6 |
| 9.  | <b>Figure S7.</b> Magnetic susceptibility for fully hydrated, partly dehydrated and rehydrated forms of NiCr and NiFe chains.                           | S7 |
| 10. | <b>Figure S8.</b> Field dependence of magnetisation measured at 2 K for fully hydrated, partly dehydrated and rehydrated forms of NiCr and NiFe chains. | S7 |

**Table S1.** Crystallographic data for **1** and **2**

|                                      | <b>1</b>                                                           | <b>2</b>                                                           |
|--------------------------------------|--------------------------------------------------------------------|--------------------------------------------------------------------|
| Empirical formula                    | C <sub>16</sub> H <sub>36</sub> CrN <sub>10</sub> NiO <sub>6</sub> | C <sub>16</sub> H <sub>36</sub> FeN <sub>10</sub> NiO <sub>6</sub> |
| Formula weight                       | 575.26                                                             | 579.11                                                             |
| Temperature / K                      | 120(2)                                                             | 120(2)                                                             |
| Crystal system                       | monoclinic                                                         | monoclinic                                                         |
| Space group                          | C2/m                                                               | C2/m                                                               |
| a / Å                                | 10.5579(5)                                                         | 10.2754(3)                                                         |
| b / Å                                | 16.3314(6)                                                         | 16.2306(4)                                                         |
| c / Å                                | 8.8748(4)                                                          | 8.8043(3)                                                          |
| $\alpha$ / °                         | 90                                                                 | 90                                                                 |
| $\beta$ / °                          | 112.254(3)                                                         | 111.265(3)                                                         |
| $\gamma$ / °                         | 90                                                                 | 90                                                                 |
| Volume / Å <sup>3</sup>              | 1416.26(11)                                                        | 1368.37(7)                                                         |
| Z                                    | 2                                                                  | 2                                                                  |
| Density (calc.) / Mg/m <sup>3</sup>  | 1.349                                                              | 1.406                                                              |
| Absorption coeff. / mm <sup>-1</sup> | 1.094                                                              | 1.066                                                              |
| F(000)                               | 604                                                                | 608                                                                |
| Crystal size / mm                    | 0.12 x 0.12 x 0.07                                                 | 0.31 x 0.22 x 0.13                                                 |
| Theta range / °                      | 3.52-24.81                                                         | 3.53-28.67                                                         |
| Reflections collected                | 6570                                                               | 8656                                                               |
| R <sub>int</sub>                     | 0.063                                                              | 0.037                                                              |
| Independent reflections              | 1265                                                               | 1722                                                               |
| Parameters                           | 95                                                                 | 98                                                                 |
| GOF on F <sup>2</sup>                | 1.077                                                              | 1.066                                                              |
| R indices [I > 2σ(I)]                | R1 = 0.0367<br>wR2 = 0.0618                                        | R1 = 0.0307<br>wR2 = 0.0654                                        |
| R indices (all data)                 | R1 = 0.0585<br>wR2 = 0.0679                                        | R1 = 0.0462<br>wR2 = 0.0731                                        |

**Table S2.** Crystallographic data for **1d** and **2d**

|                            | <b>1d</b>                                                            | <b>2d</b>                                                          |
|----------------------------|----------------------------------------------------------------------|--------------------------------------------------------------------|
| Empirical formula          | C <sub>16</sub> H <sub>29</sub> CrN <sub>10</sub> NiO <sub>2.5</sub> | C <sub>16</sub> H <sub>30</sub> FeN <sub>10</sub> NiO <sub>3</sub> |
| Formula weight             | 512.15                                                               | 525.01                                                             |
| Temperature / K            | 298                                                                  | 298                                                                |
| Crystal system             | monoclinic                                                           | monoclinic                                                         |
| Space group                | <i>P</i> 2 <sub>1</sub>                                              | <i>P</i> 2 <sub>1</sub>                                            |
| <i>a</i> / Å               | 9.8002(14)                                                           | 9.8927                                                             |
| <i>b</i> / Å               | 11.9983(17)                                                          | 12.1549                                                            |
| <i>c</i> / Å               | 10.1260(11)                                                          | 10.1774                                                            |
| $\alpha$ / °               | 90                                                                   | 90                                                                 |
| $\beta$ / °                | 102.646(19)                                                          | 102.013                                                            |
| $\gamma$ / °               | 90                                                                   | 90                                                                 |
| Volume / Å <sup>3</sup>    | 1161.8(3)                                                            | 1197.0                                                             |
| <i>Z</i>                   | 2                                                                    | 2                                                                  |
| R <sub>p</sub> (Rietveld)  | 0.1852                                                               |                                                                    |
| R <sub>wp</sub> (Rietveld) | 0.1839                                                               |                                                                    |

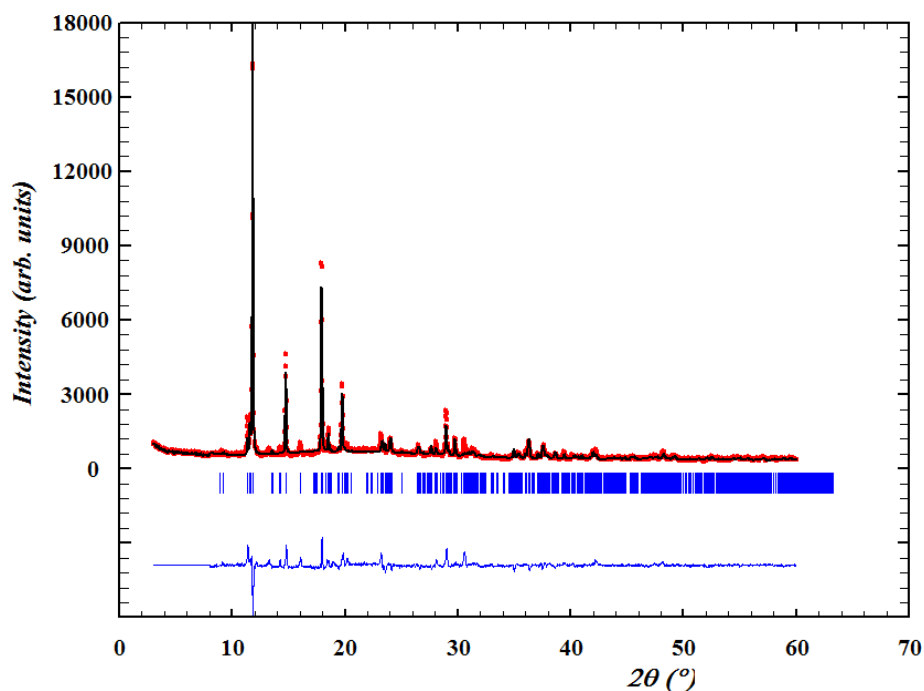**Figure S1.** The Rietveld plot for **1d**.

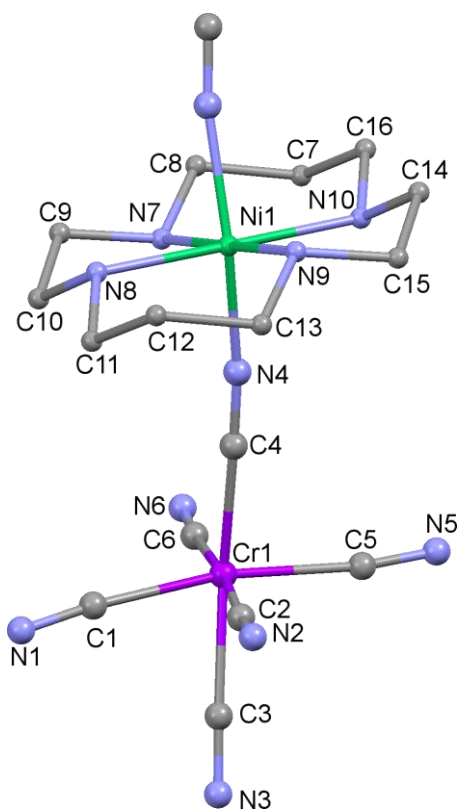

**Figure S2.** Structure of **1d** with atom numbering; thermal spheres at 50% probability.

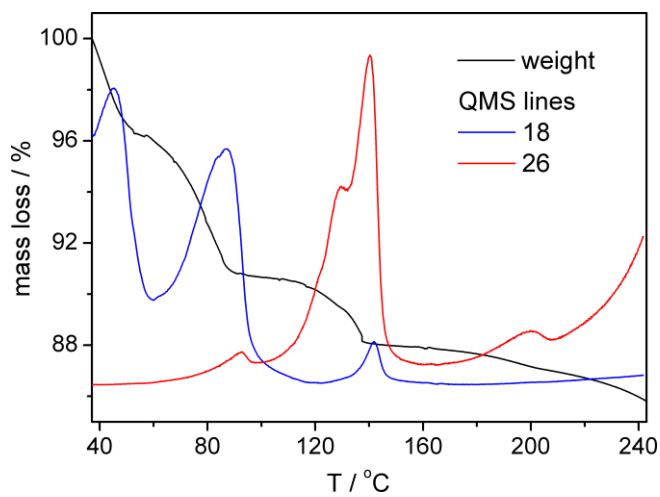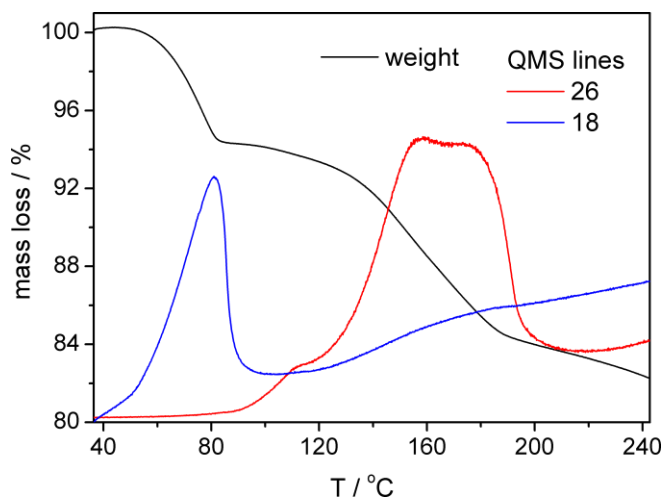

**Figure S3.** Thermogravimetric analysis of **1** (left) and **2** (right).

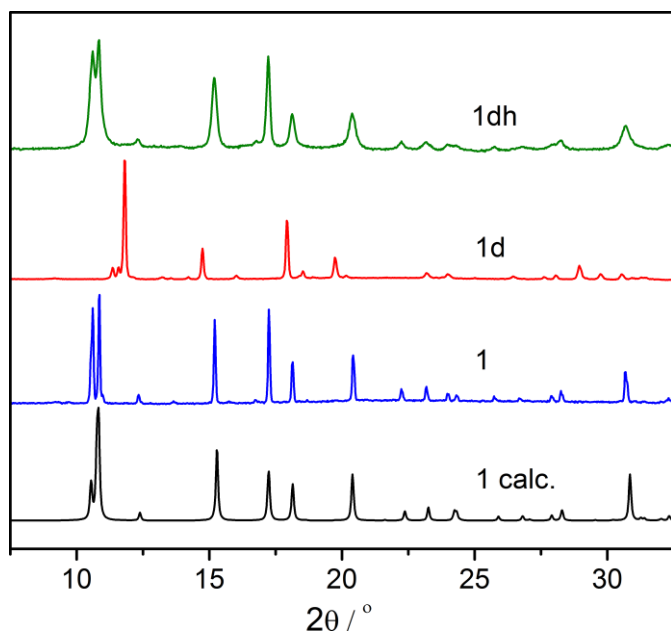

**Figure S4.** PXRD patterns for as synthesised fully hydrated **1**, partly dehydrated **1d** and rehydrated **1dh** in comparison to the pattern generated from the single-crystal structure of **1**.

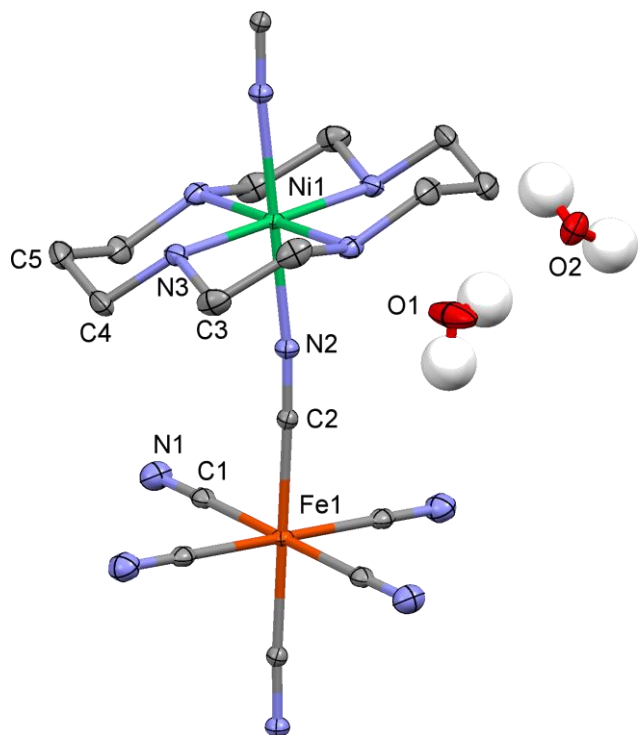

**Figure S5.** Structure of **2** with atom numbering; thermal ellipsoids at 50% probability; hydrogen atoms on cyclam ring omitted for clarity.

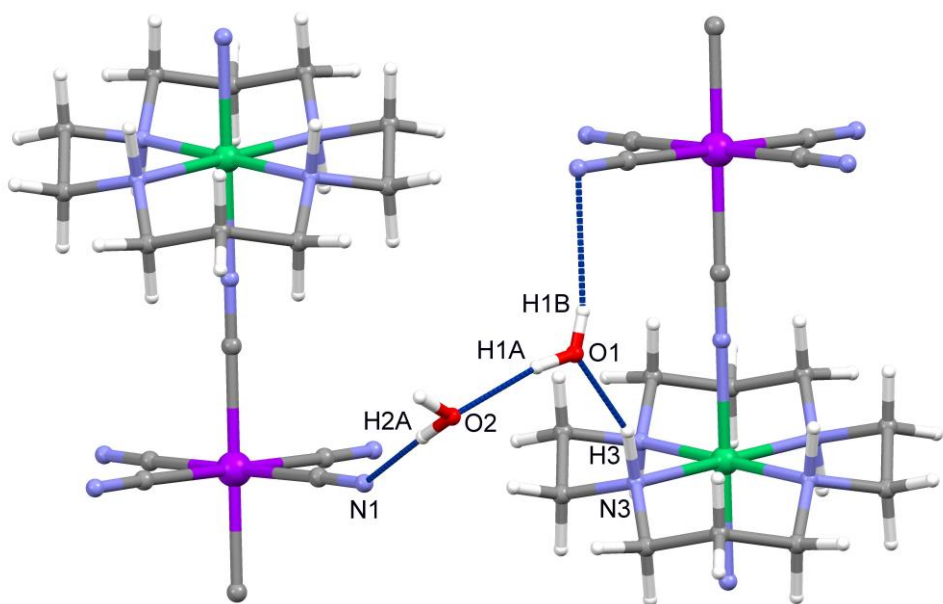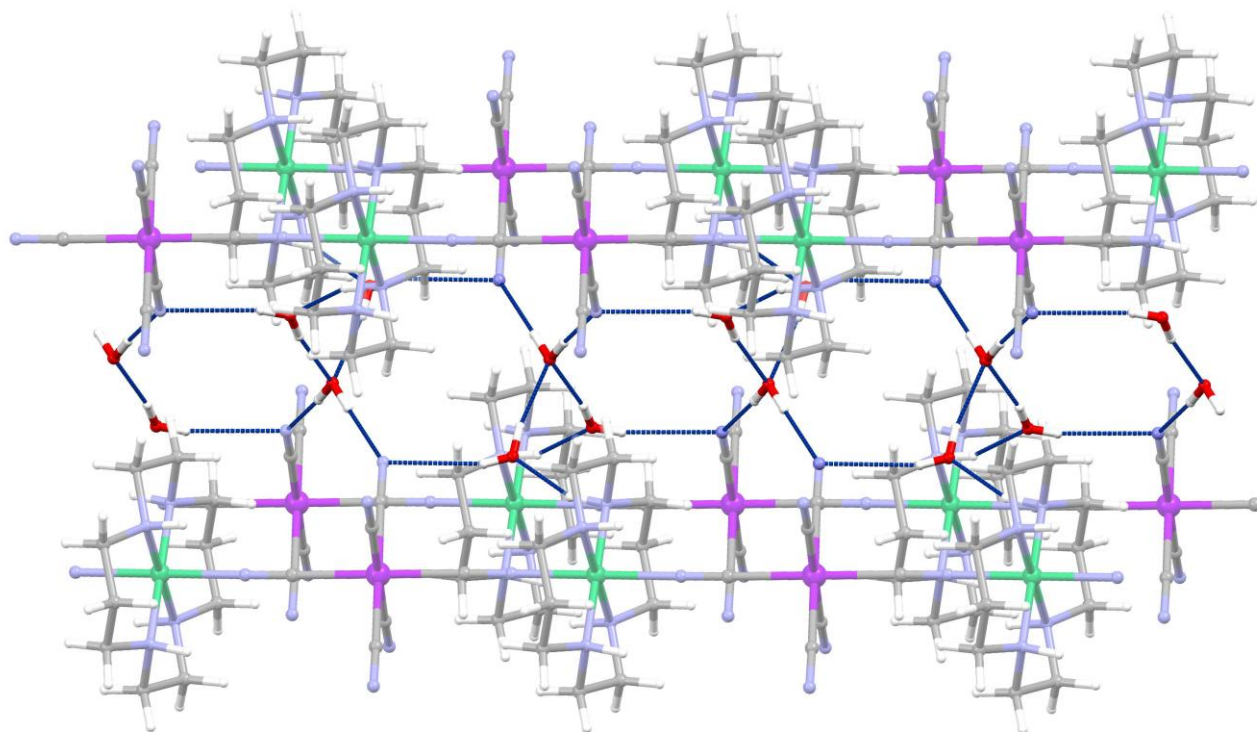

**Figure S6.** Hydrogen bonds in the structure of **1**: detail view with atom numbering (top); view of the net (bottom).

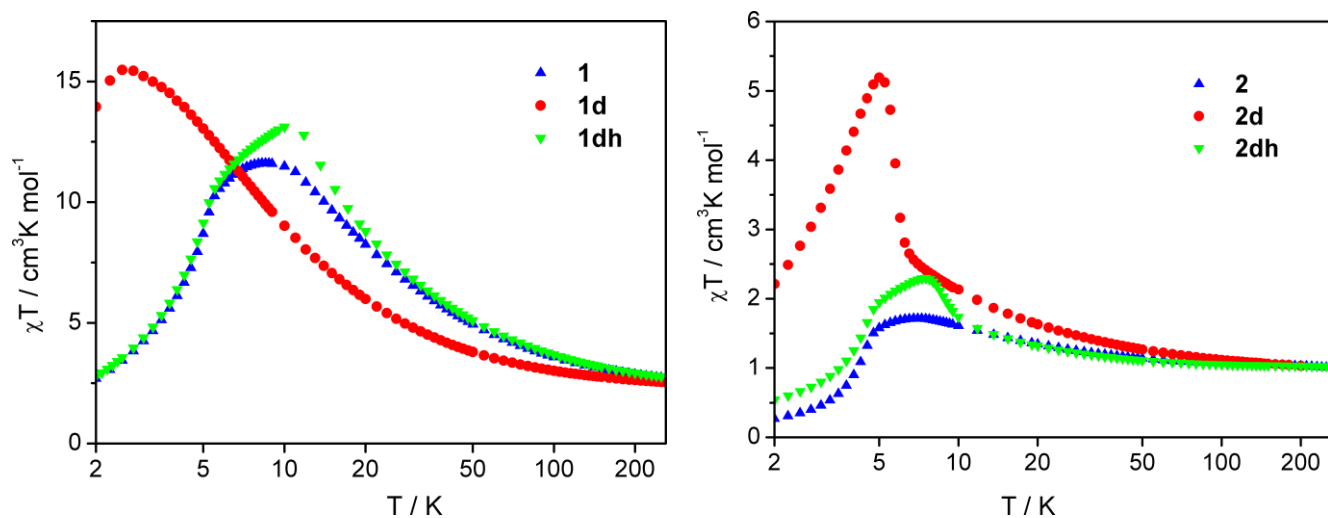

**Figure S7.** Magnetic susceptibility at 1kOe for fully hydrated, partly dehydrated (**d**) and rehydrated (**dh**) forms of NiCr and NiFe chains; temperature in logarithmic scale.

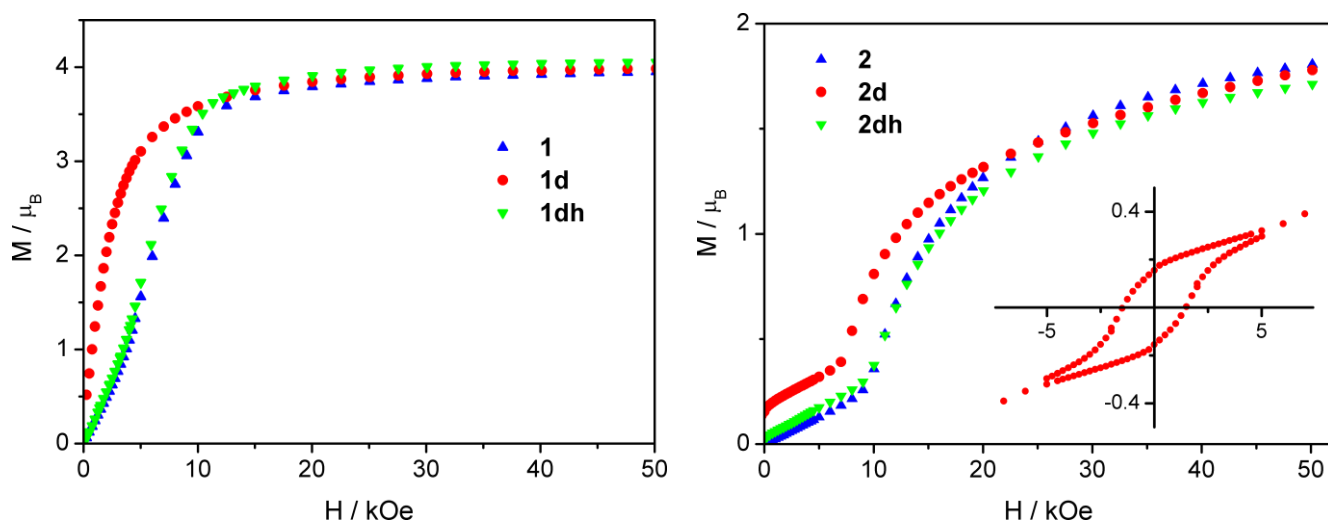

**Figure S8.** Field dependence of magnetisation measured at 2 K for fully hydrated, partly dehydrated (**d**) and rehydrated (**dh**) forms of NiCr and NiFe chains; inset in the right graph shows magnetic hysteresis for **2d**.
